# Supplementary material
Source: publisher site journal article supplement (https://www.spandidos-publications.com/3482/downloadSupplementary)
Supplement: Supplementary file 1 [file downloadSupplementary]

## Sheet: Table SI
Table SI. Primers used in Sanger sequencing of RHOA
RHOA CDS1 forward	5'-GTGTCATCCTGTAAGCTACC-3'
RHOA CDS1 reverse	5'-ACTTGGACTAAGATGGCAGG-3'
RHOA CDS2 forward	5'-TGCCATTTCAATGGTCTGCC-3'
RHOA CDS2 reverse	5'-CCACTGACGATGATTGCTTC-3'
RHOA CDS3 forward	5'-GATGCTCAGCACCACTCTTG-3'
RHOA CDS3 reverse	5'-CCCCAAACCTCCAAACTTGG-3'
RHOA CDS4 forward	5'-GACCGACGAGCAAAACTGTC-3'
RHOA CDS4 reverse	5'-GAGCAGTGTCAAAAGGACCC-3'
